# Supplementary material for: Barriers to and enablers of uptake of and adherence to antiretroviral therapy in the context of integrated HIV and tuberculosis treatment among adults in sub-Saharan Africa: a protocol for a systematic literature review
Source: PubMed Central journal article supplement — BMJ Open. 2019 Oct 28;9(10):e031789. doi: 10.1136/bmjopen-2019-031789 (PMC6830592; doi:10.1136/bmjopen-2019-031789), 2019-10-28
Supplement: bmjopen-2019-031789supp001.pdf [file bmjopen-2019-031789supp001.pdf]

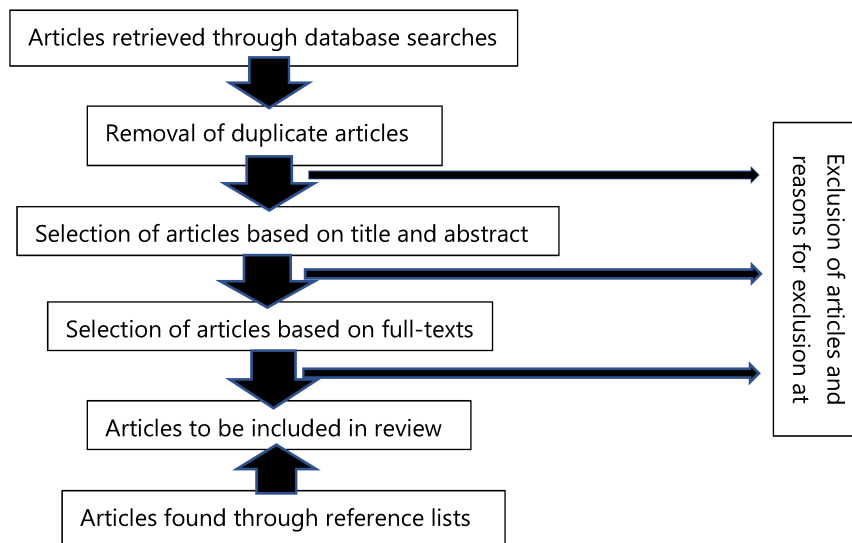

**Figure 1: Flow diagram for identification of studies to be reviewed on uptake of and adherence to ART in the context of integrated HIV and TB care in sub-Saharan Africa.**
